# Supplementary material for: Cholesterol-Induced Metabolic Reprogramming in Breast Cancer Cells Is Mediated via the ERRα Pathway
Source: MDPI journal article supplement (doi:10.3390/cancers13112605), 2021-05-26
Supplement: s1 [file s1]

# Supplementary Materials: Cholesterol-Induced Metabolic Reprogramming in Breast Cancer Cells Is Mediated via the ERR $\alpha$ Pathway

Faegheh Ghanbari, Anne-Marie Fortier, Morag Park and Anie Philip

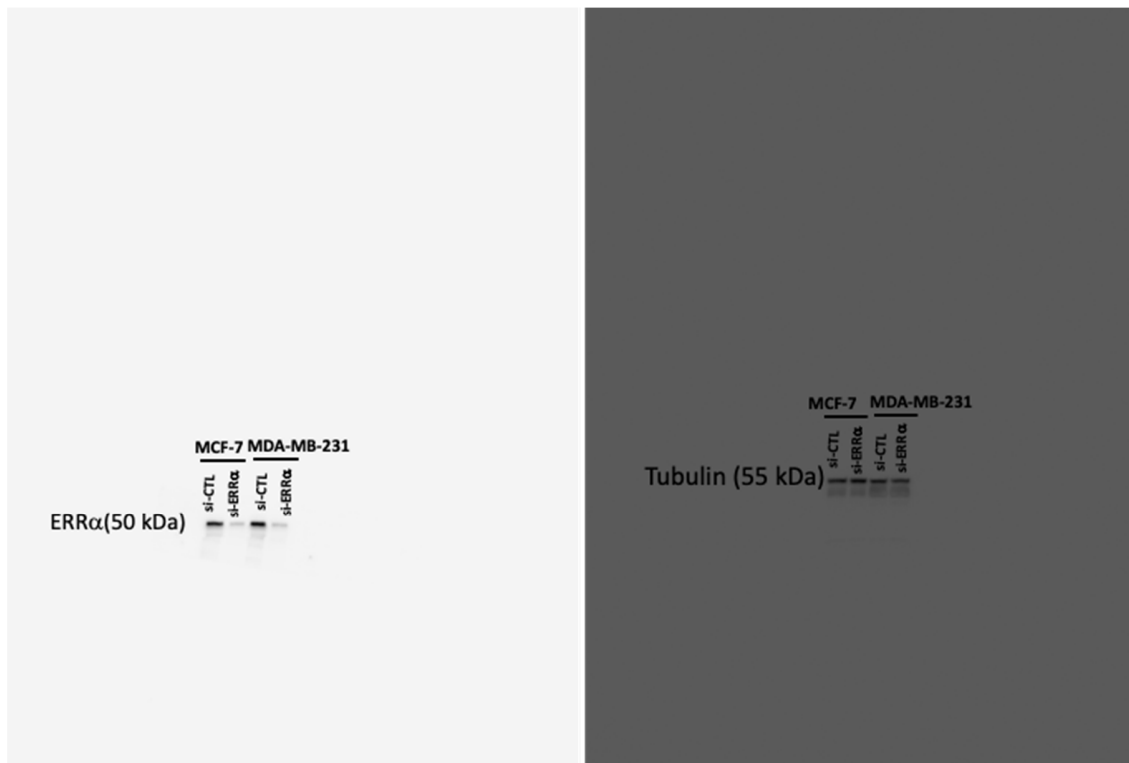

Figure S1. Uncorrupted western blot for Figures 1B & 1G.

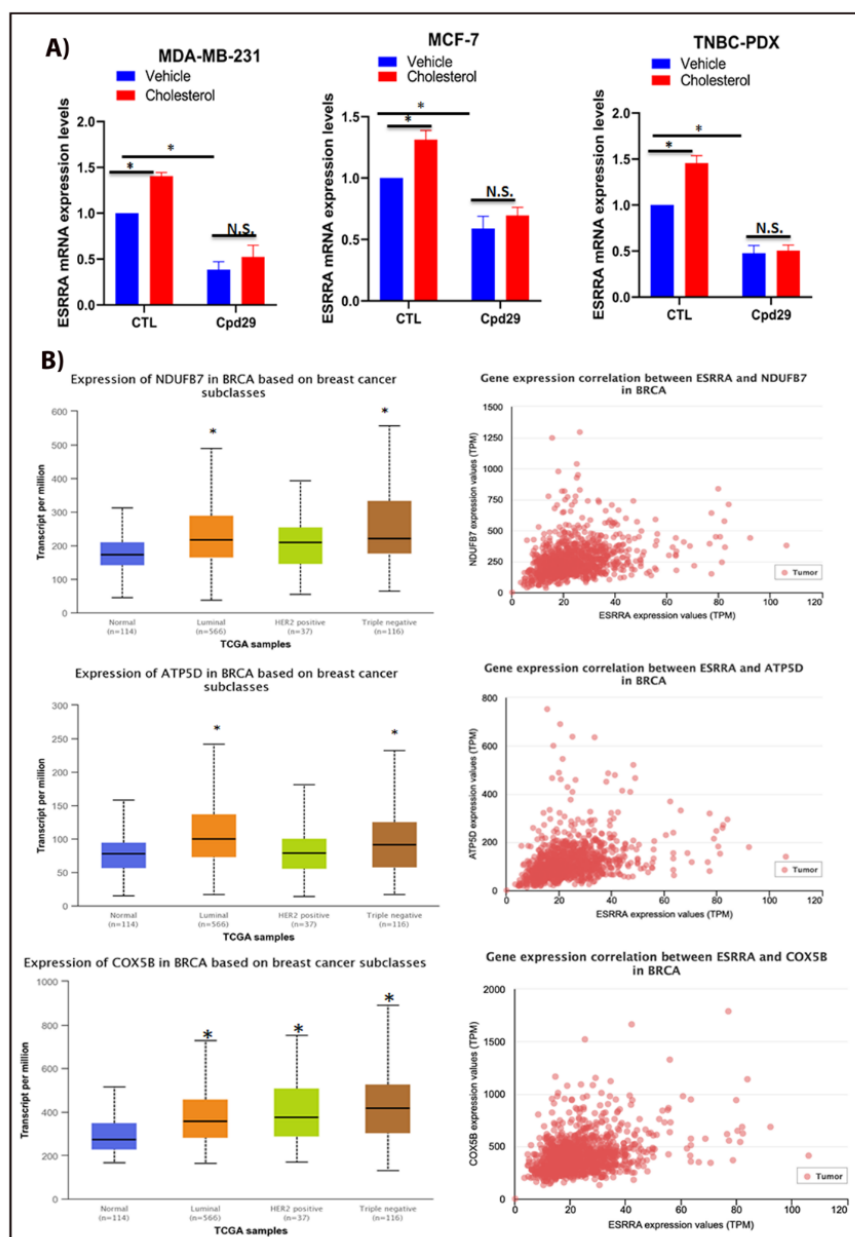

**Figure S2.** ERRα gene expression levels are positively correlated with the key enzymes involved in OXPHOS using TCGA databases. **(A)** The relative mRNA levels of ERRα in MDA-MB-231, MCF-7, and TNBC-PDX cells. Total RNA was extracted and analyzed using RT-qPCR. MDA-MB-231 cells were treated with vehicle (Veh), cholesterol (Chol, 5 μM) and/or cpd29 (5 μM) for 48 h. MCF-7 and TNBC-PDX cells were treated with vehicle (Veh), cholesterol (Chol, 10 μM) and/or cpd29 (10 μM) for 48 h. **(B)** The data represents the mRNA levels of the indicated genes in breast tumors and corresponding normal tissue obtained from the TCGA database. The graphs were visualized using the UALCAN web-portal. Expression of NADH dehydrogenase [ubiquinone] 1 beta subcomplex subunit 7 (NDUFB7) and ATP synthase subunit delta, mitochondrial (ATP5D) and COX5B: Cytochrome c oxidase subunit 5B in different subtypes of breast cancer and their correlation to the ERRα gene expression in breast tumors. The significance (\*) was defined by comparing each subtype to the normal tissue.

**Table 1.** The human primers used for qPCR.

| Name                                                        | Oligo Name        | Sequence (5' to 3')      |
|-------------------------------------------------------------|-------------------|--------------------------|
| Glyceraldehyde 3-phosphate dehydrogenase                    | GAPDH Forward(F)  | GTCTCCTCTGACTTCAACAGCG   |
|                                                             | GAPDH Reverse (R) | ACCACCCTGTTGCTGTAGCCAA   |
| NADH dehydrogenase [ubiquinone] 1 beta subcomplex subunit 7 | NDUFB7 F          | CTGCTCAAGTGCAAGCGTGACA   |
|                                                             | NDUFB7 R          | CGCTCAAACCTCCTTCATGCGCA  |
| Cytochrome <i>c</i> oxidase subunit 5B, mitochondrial       | COX5B F           | GGAGATCATGCTGGCTGCAAAG   |
|                                                             | COX5B R           | GCAGCCTACTATTCTCTTGTG    |
| ATP synthase subunit <i>g</i> , mitochondrial               | ATP5L F           | CCTGCTGAGATCCCTAGAGCTA   |
|                                                             | ATP5L R           | CCGACATAAAACCATCAACACC   |
| Methionine synthase                                         | MTR F             | CCAACCTGTCTTCTCCTTCCG    |
|                                                             | MTR R             | CATACACAGGGAGGTTTCCAGC   |
| Trifunctional purine biosynthetic protein adenosine-3       | GART F            | GCACATCTCTGCCTGTTTGGCT   |
|                                                             | GART R            | CATGGAACACCTCCAGTCCTAG   |
| Glucose-6-phosphate dehydrogenase                           | G6PD F            | CTGTTCCGTGAGGACCAGATCT   |
|                                                             | G6PD R            | TGAAGGTGAGGATAACGCAGGC   |
| 6-Phosphogluconate dehydrogenase                            | 6PGD F            | GTTCCAAGACACCGATGGCAAAC  |
|                                                             | 6PGD R            | CACCGAGCAAAGACAGCTTCTC   |
| Estrogen-related receptor alpha                             | ESRRA F           | CCACTATGGTGTGGCATCCTGT   |
|                                                             | ESRRA R           | GGTGATCTCACACTCGTTGGAG   |
| Citrate synthetase                                          | CS F              | CACAGGGTATCAGCCGAACCAA   |
|                                                             | CS R              | CCAATACCGCTGCCTTCTCTGT   |
| Fumarate hydratase                                          | FH F              | CCGCTGAAGTAAACCAGGATTATG |
|                                                             | FH R              | ATCCAGTCTGCCATACCACGAG   |
| Aconitase 2                                                 | ACO2 F            | CAATCGTCACCTCCTACAACAGG  |
|                                                             | ACO2 R            | GTCTCTGGGTTGAACTTGAGGG   |

**Table 2.** Basal-like breast tumor patient identification obtained from GEO: GSE78958 study.

| BMI status     | Patient ID |
|----------------|------------|
| BMI>25<br>N=16 | GSM2082151 |
|                | GSM2082188 |
|                | GSM2082294 |
|                | GSM2082303 |
|                | GSM2082370 |
|                | GSM2082160 |
|                | GSM2082163 |
|                | GSM2082205 |
|                | GSM2082300 |

|                  |            |
|------------------|------------|
| BMI ≤ 25<br>N=15 | GSM2082310 |
|                  | GSM2082440 |
|                  | GSM2082325 |
|                  | GSM2082454 |
|                  | GSM2082382 |
|                  | GSM2082340 |
|                  | GSM2082298 |
|                  | GSM2082095 |
|                  | GSM2082109 |
|                  | GSM2082169 |
|                  | GSM2082177 |
|                  | GSM2082274 |
|                  | GSM2082352 |
|                  | GSM2082384 |
|                  | GSM2082400 |
|                  | GSM2082385 |
|                  | GSM2082297 |
|                  | GSM2082234 |
|                  | GSM2082341 |
|                  | GSM2082379 |
|                  | GSM2082270 |
|                  | GSM2082423 |
